# Supplementary material for: An electron-deficient MOF as an efficient electron-transfer catalyst for selective oxidative carbon–carbon coupling of 2,6-di-tert-butylphenol
Source: Royal Society of Chemistry journal article supplement (doi:10.1039/d2dt00869f), 2022-01-01
Supplement: d2dt00869f1.pdf [file d2dt00869f1.pdf]

# An electron-deficient MOF as efficient electron-transfer catalyst for selective oxidative carbon-carbon coupling of 2,6-di-*tert*-butylphenol

*Teng Liu, Xianfu Shen, Zhengfen Liu, Feng Zhang and Jian-Jun Liu\**

*College of Chemistry and Environmental Science, Qujing Normal University, Qujing 655011, China*

*E-mail: jjliu302@163.com*

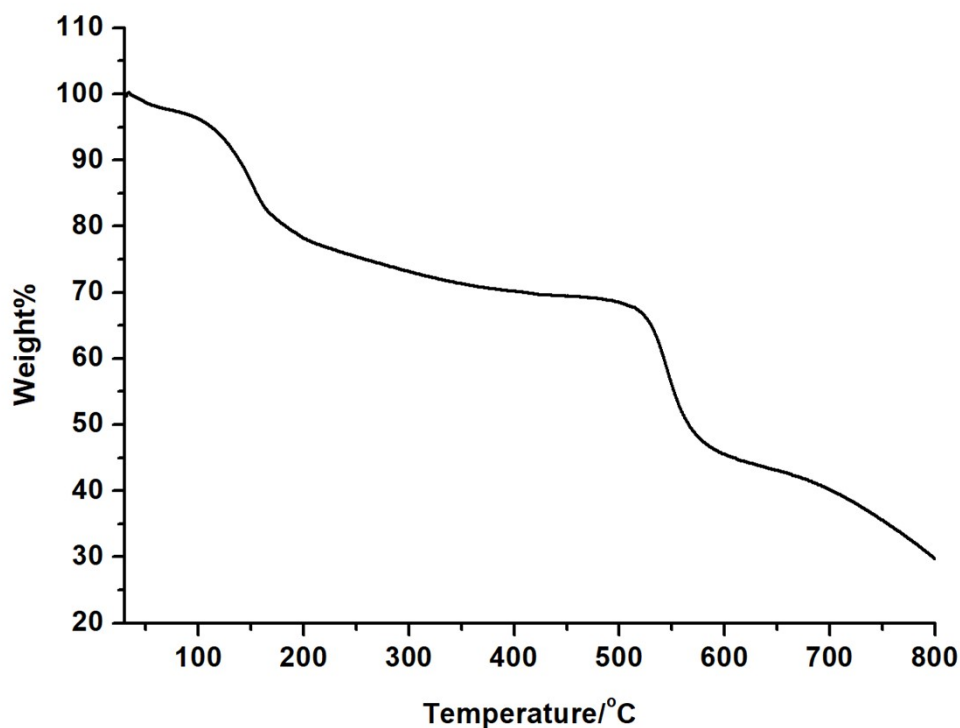

Fig. S1. TGA curve of MOF **1** under N<sub>2</sub> atmosphere with a heating rate of 10 °C/min.

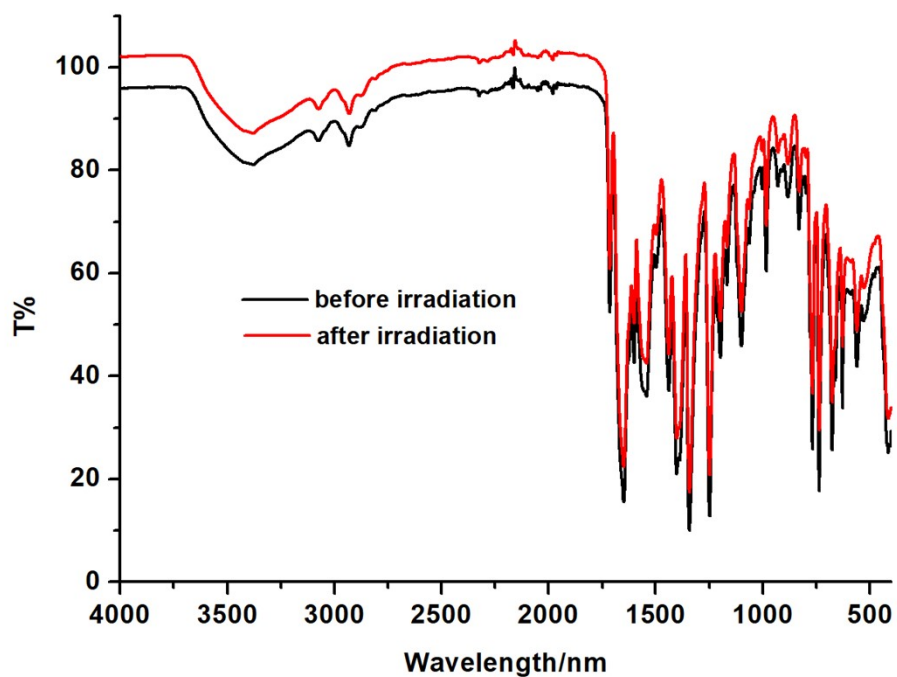

Fig. S2. Infrared spectrum of MOF 1 before and after irradiation.

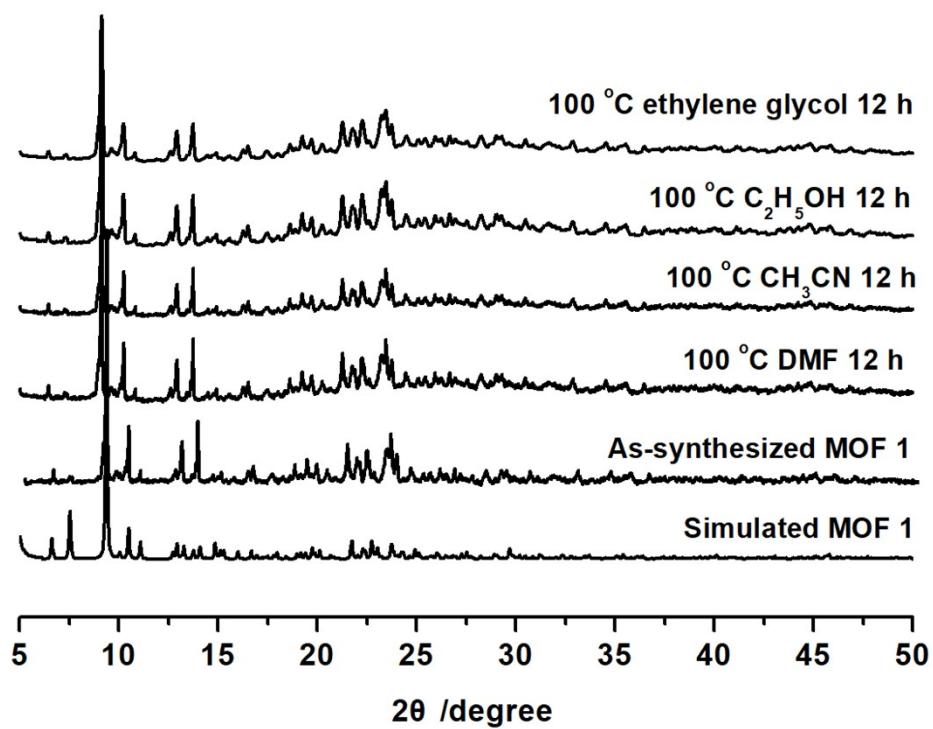

Fig. S3. XRD patterns of MOF 1 treated in different solvents.

Table S1. Test the catalytic activity of MOF 1 for the transformation of 2, 6-di-*tert*-butylphenol<sup>a</sup>

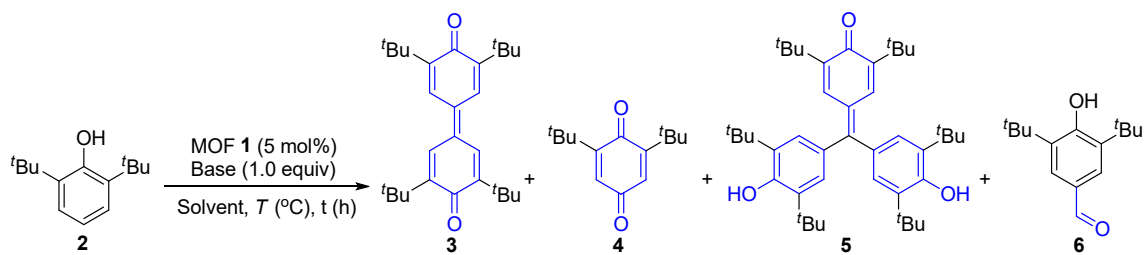

| Entry     | Base                               | Solvent                                 | T (°C)     | t (h)     | <b>3</b> <sup>b</sup> | <b>4</b> <sup>b</sup> | <b>5</b> <sup>b</sup> | <b>6</b> <sup>b</sup> |
|-----------|------------------------------------|-----------------------------------------|------------|-----------|-----------------------|-----------------------|-----------------------|-----------------------|
| 1         | KOH                                | MeOH                                    | 45         | 24        | 45%                   | 12%                   | -                     | -                     |
| 2         | NaOH                               | MeOH                                    | 45         | 24        | 38%                   | 13%                   | -                     | -                     |
| 3         | KO <sup>t</sup> Bu                 | MeOH                                    | 45         | 24        | 28%                   | 43%                   | -                     | -                     |
| 4         | C <sub>S2</sub> CO <sub>3</sub>    | MeOH                                    | 45         | 24        | 29%                   | 15%                   | -                     | -                     |
| 5         | DABCO                              | MeOH                                    | 45         | 24        | 31%                   | 6%                    | -                     | -                     |
| 6         | DBU                                | MeOH                                    | 45         | 24        | 28%                   | 25%                   | -                     | -                     |
| 7         | KO <sup>t</sup> Bu                 | MeOH                                    | 65         | 24        | 21%                   | 53%                   | -                     | -                     |
| 8         | KO <sup>t</sup> Bu                 | MeOH                                    | 85         | 24        | 23%                   | 51%                   | -                     | -                     |
| 9         | KO <sup>t</sup> Bu                 | MeOH                                    | 65         | 36        | 23%                   | 63%                   | -                     | -                     |
| 10        | KO <sup>t</sup> Bu                 | MeOH                                    | 65         | 48        | 23%                   | 72%                   | -                     | -                     |
| <b>11</b> | <b>KO<sup>t</sup>Bu</b>            | <b>MeOH</b>                             | <b>65</b>  | <b>60</b> | <b>19%</b>            | <b>75%</b>            | -                     | -                     |
| 12        | KO <sup>t</sup> Bu                 | MeOH                                    | 65         | 72        | 19%                   | 75%                   | -                     | -                     |
| 13        | KOH                                | MeOH                                    | 65         | 24        | 53%                   | 18%                   | -                     | -                     |
| 14        | KOH                                | MeOH                                    | 85         | 24        | 57%                   | 19%                   | -                     | -                     |
| 15        | KOH                                | HOCH <sub>2</sub> CH <sub>2</sub> OH    | 120        | 24        | 71%                   | 12%                   | 15%                   | -                     |
| 16        | NaOH                               | HOCH <sub>2</sub> CH <sub>2</sub> OH    | 120        | 24        | 65%                   | 16%                   | 14%                   | -                     |
| 17        | KO <sup>t</sup> Bu                 | HOCH <sub>2</sub> CH <sub>2</sub> OH    | 120        | 24        | 78%                   | 5%                    | -                     | -                     |
| <b>18</b> | <b>DABCO</b>                       | <b>HOCH<sub>2</sub>CH<sub>2</sub>OH</b> | <b>120</b> | <b>24</b> | <b>93%</b>            | <b>Trace</b>          | -                     | -                     |
| 19        | DMAP                               | HOCH <sub>2</sub> CH <sub>2</sub> OH    | 120        | 24        | 91%                   | Trace                 | -                     | -                     |
| 20        | DBU                                | HOCH <sub>2</sub> CH <sub>2</sub> OH    | 120        | 24        | 91%                   | Trace                 | -                     | -                     |
| 21        | C <sub>S2</sub> CO <sub>3</sub>    | HOCH <sub>2</sub> CH <sub>2</sub> OH    | 120        | 24        | 85%                   | 8%                    | -                     | -                     |
| 22        | K <sub>2</sub> CO <sub>3</sub>     | HOCH <sub>2</sub> CH <sub>2</sub> OH    | 120        | 24        | 66%                   | -                     | 25%                   | 6%                    |
| 23        | K <sub>2</sub> CO <sub>3</sub>     | HOCH <sub>2</sub> CH <sub>2</sub> OH    | 120        | 36        | 48%                   | -                     | 39%                   | 8%                    |
| 24        | K <sub>2</sub> CO <sub>3</sub>     | HOCH <sub>2</sub> CH <sub>2</sub> OH    | 120        | 48        | 32%                   | -                     | 45%                   | 10%                   |
| 25        | K <sub>2</sub> CO <sub>3</sub>     | HOCH <sub>2</sub> CH <sub>2</sub> OH    | 120        | 60        | 25%                   | -                     | 58%                   | 11%                   |
| 26        | K <sub>2</sub> CO <sub>3</sub>     | HOCH <sub>2</sub> CH <sub>2</sub> OH    | 130        | 60        | 18%                   | -                     | 65%                   | 11%                   |
| 27        | K <sub>2</sub> CO <sub>3</sub>     | HOCH <sub>2</sub> CH <sub>2</sub> OH    | 140        | 60        | 11%                   | -                     | 78%                   | 9%                    |
| <b>28</b> | <b>K<sub>2</sub>CO<sub>3</sub></b> | <b>HOCH<sub>2</sub>CH<sub>2</sub>OH</b> | <b>150</b> | <b>60</b> | <b>8%</b>             | -                     | <b>82%</b>            | <b>6%</b>             |
| 29        | K <sub>2</sub> CO <sub>3</sub>     | HOCH <sub>2</sub> CH <sub>2</sub> OH    | 160        | 60        | 7%                    | -                     | 82%                   | 7%                    |

<sup>a</sup>The reaction was performed with **2** (1.0 mmol), Base (1.0 mmol) and MOF 1 (5 mol%), and exposed in air. <sup>b</sup>Isolated yield based on the starting material **2**.

Table S2. Optimal conditions of H<sub>2</sub>BBNDI for the transformation of 2, 6-di-*tert*-butylphenol<sup>a</sup>

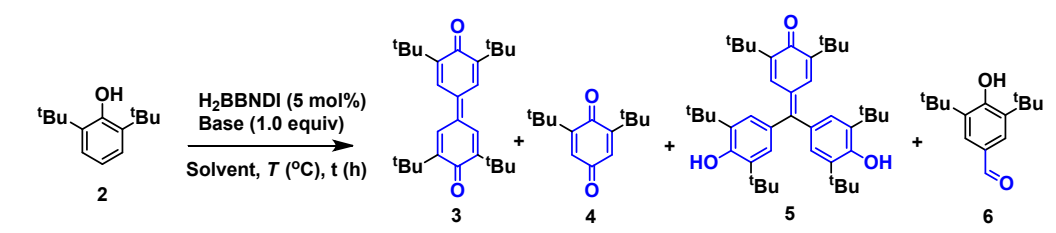

| Entry | Base                           | Solvent | <i>T</i> (°C) | <i>t</i> (h) | <b>3<sup>b</sup></b> | <b>4<sup>b</sup></b> | <b>5<sup>b</sup></b> | <b>6<sup>b</sup></b> |
|-------|--------------------------------|---------|---------------|--------------|----------------------|----------------------|----------------------|----------------------|
| 1     | KO <sup>t</sup> Bu             | MeOH    | 65            | 60           | 12%                  | 16%                  | -                    | -                    |
| 2     | DABCO                          | EG      | 120           | 24           | <5%                  | <5%                  | -                    | -                    |
| 3     | K <sub>2</sub> CO <sub>3</sub> | EG      | 150           | 60           | 7%                   | <5%                  | 12%                  | -                    |

<sup>a</sup>The reaction was performed with **2** (1.0 mmol), Base (1.0 mmol) and H<sub>2</sub>BBNDI (5 mol%), and exposed in air. <sup>b</sup>Isolated yield based on the starting material **2**.

Table S3. The recycle experiments of MOF 1 for the transformation of 2, 6-di-*tert*-butylphenol.

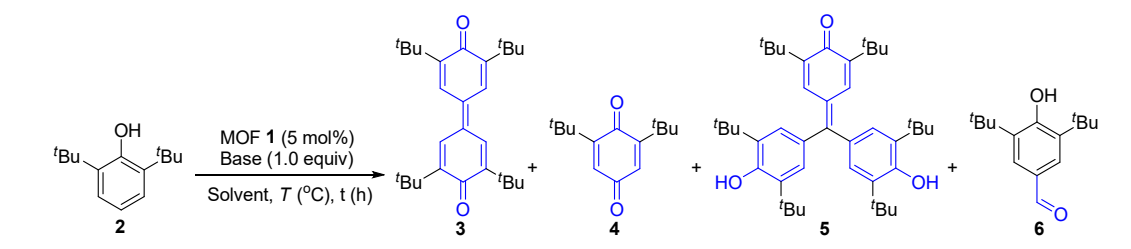

| Runs | Base                           | Solvent | <i>T</i> (°C) | <i>t</i> (h) | <b>3<sup>b</sup></b> | <b>4<sup>b</sup></b> | <b>5<sup>b</sup></b> | <b>6<sup>b</sup></b> |
|------|--------------------------------|---------|---------------|--------------|----------------------|----------------------|----------------------|----------------------|
| 1    | KO <sup>t</sup> Bu             | MeOH    | 65            | 60           | 23%                  | 75%                  | -                    | -                    |
| 2    | KO <sup>t</sup> Bu             | MeOH    | 65            | 60           | 20%                  | 71%                  | -                    | -                    |
| 3    | KO <sup>t</sup> Bu             | MeOH    | 65            | 60           | 19%                  | 68%                  | -                    | -                    |
| 1    | DABCO                          | EG      | 120           | 24           | 93%                  | <5%                  | -                    | -                    |
| 2    | DABCO                          | EG      | 120           | 24           | 89%                  | <5%                  | -                    | -                    |
| 3    | DABCO                          | EG      | 120           | 24           | 86%                  | <5%                  | -                    | -                    |
| 1    | K <sub>2</sub> CO <sub>3</sub> | EG      | 150           | 60           | 8%                   | -                    | 82%                  | 6%                   |
| 2    | K <sub>2</sub> CO <sub>3</sub> | EG      | 150           | 60           | <5%                  | -                    | 78%                  | 10%                  |
| 3    | K <sub>2</sub> CO <sub>3</sub> | EG      | 150           | 60           | <5%                  | -                    | 75%                  | 12%                  |

<sup>a</sup>The reaction was performed with **2** (1.0 mmol), Base (1.0 mmol) and MOF 1 (5 mol%), and exposed in air. <sup>b</sup>Isolated yield based on the starting material **2**.

**3,3',5,5'-tetra-*tert*-butyl-[1,1'-bi(cyclohexylidene)]-2,2',5,5'-tetraene-4,4'-dione (3)**

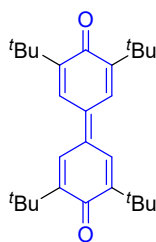

Orange solid,  $^1\text{H}$  NMR (400 MHz,  $\text{CDCl}_3$ ):  $\delta = 7.72$  (s, 4H, 4CH), 1.37 (s, 36H, 12 $\text{CH}_3$ );  $^{13}\text{C}$  NMR (100 MHz,  $\text{CDCl}_3$ ):  $\delta = 186.5, 150.4, 136.1, 126.1, 36.0, 29.6$ .

**2,6-di-*tert*-butylcyclohexa-2,5-diene-1,4-dione (4)**

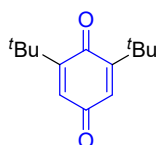

Yellow solid,  $^1\text{H}$  NMR (400 MHz,  $\text{CDCl}_3$ ):  $\delta = 6.43$  (s, 2H, 2CH), 1.20 (s, 18H, 6 $\text{CH}_3$ );  $^{13}\text{C}$  NMR (100 MHz,  $\text{CDCl}_3$ ):  $\delta = 189.2, 187.8, 157.9, 130.2, 35.6, 29.4$ .

**4-(bis(3,5-di-*tert*-butyl-4-hydroxyphenyl)methylene)-2,6-di-*tert*-butylcyclohexa-2,5-dienone (5)**

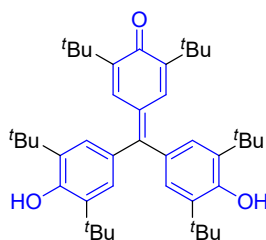

Orange solid,  $^1\text{H}$  NMR (400 MHz,  $\text{CDCl}_3$ ):  $\delta = 7.23$  (s, 2H, 2CH), 7.06 (s, 4H, 4ArH), 5.54 (br, 2H, 2ArOH), 1.59 (s, 36H, 12 $\text{CH}_3$ ), 1.30 (s, 18H, 6 $\text{CH}_3$ );  $^{13}\text{C}$  NMR (100 MHz,  $\text{CDCl}_3$ ):  $\delta = 186.01, 160.6, 155.7, 145.6, 134.9, 133.6, 131.9, 131.1, 35.3, 34.4, 30.4, 29.7$ .

**3,5-di-*tert*-butyl-4-hydroxybenzaldehyde (6)**

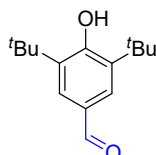

Yellow solid,  $^1\text{H}$  NMR (400 MHz,  $\text{CDCl}_3$ ):  $\delta = 9.85$  (s, 1H, CHO), 7.73 (s, 2H, 2ArH), 5.87 (s, 1H, ArOH), 1.48 (s, 18H, 6 $\text{CH}_3$ );  $^{13}\text{C}$  NMR (100 MHz,  $\text{CDCl}_3$ ):  $\delta = 192.0, 159.7, 136.5, 128.7, 127.7, 34.4, 30.1$ .

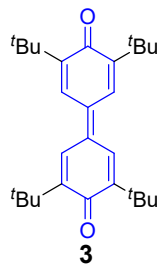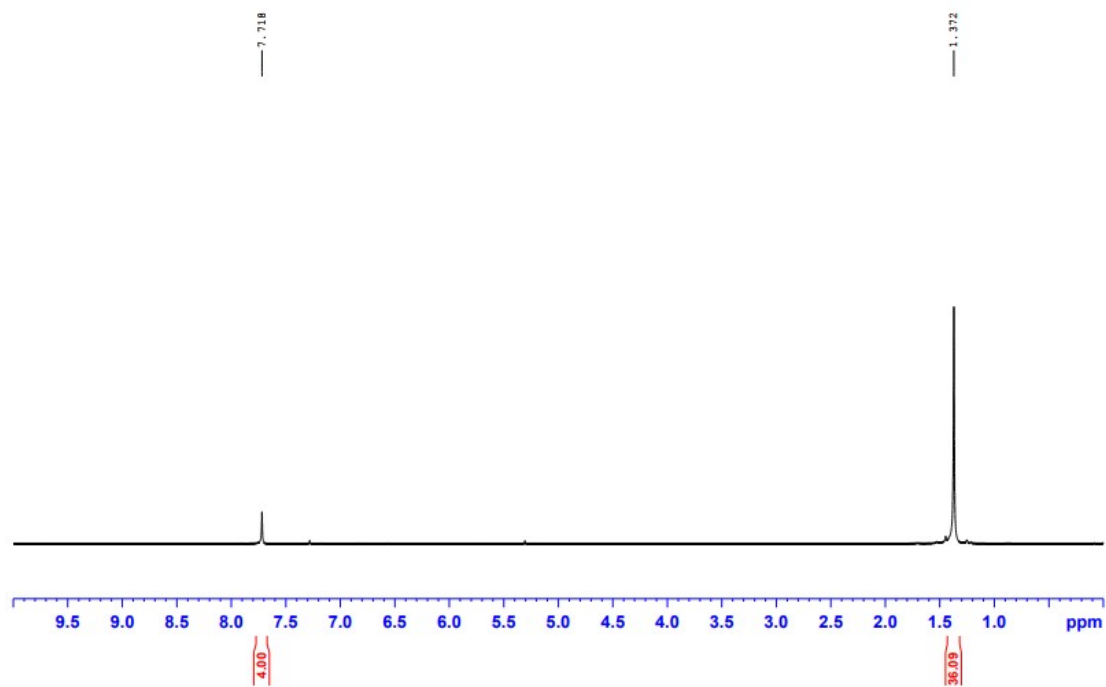

**Fig. S4.** <sup>1</sup>H NMR (400MHz, CDCl<sub>3</sub>) spectra of compound **3**

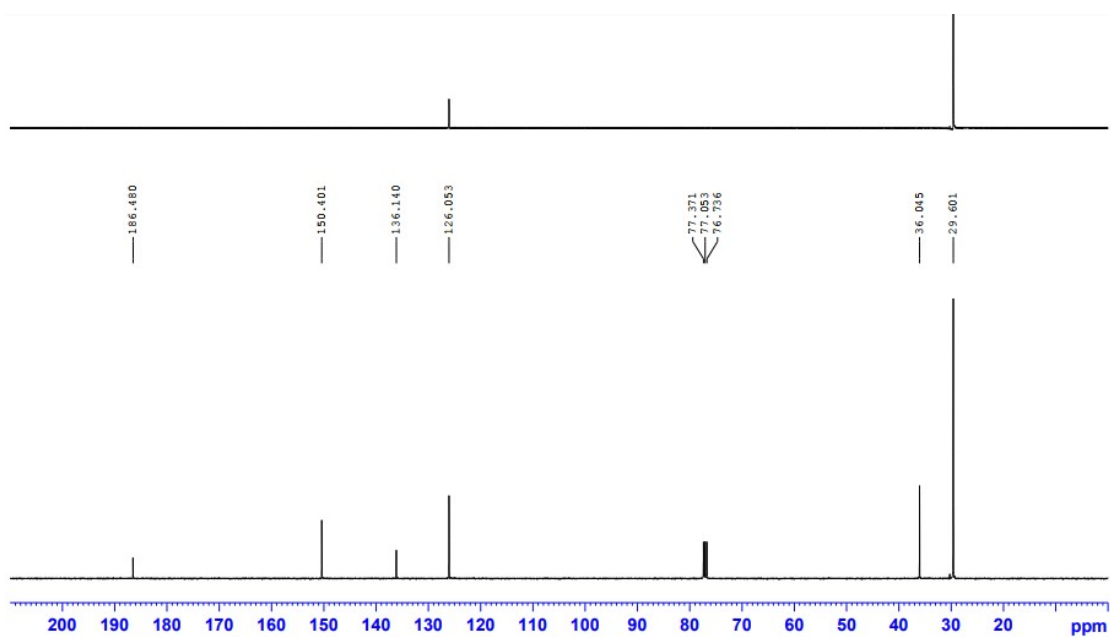

**Fig. S5.** <sup>13</sup>C NMR (100MHz, CDCl<sub>3</sub>) spectra of compound **3**

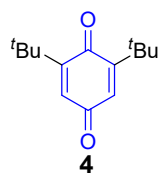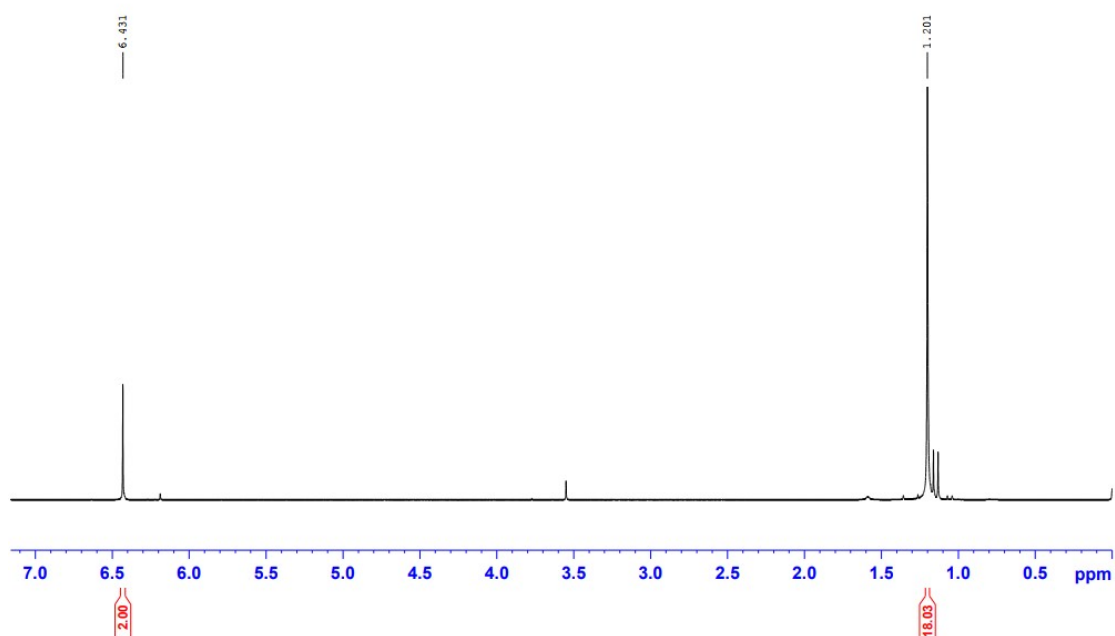

**Fig. S6.** <sup>1</sup>H NMR (400MHz, CDCl<sub>3</sub>) spectra of compound **4**

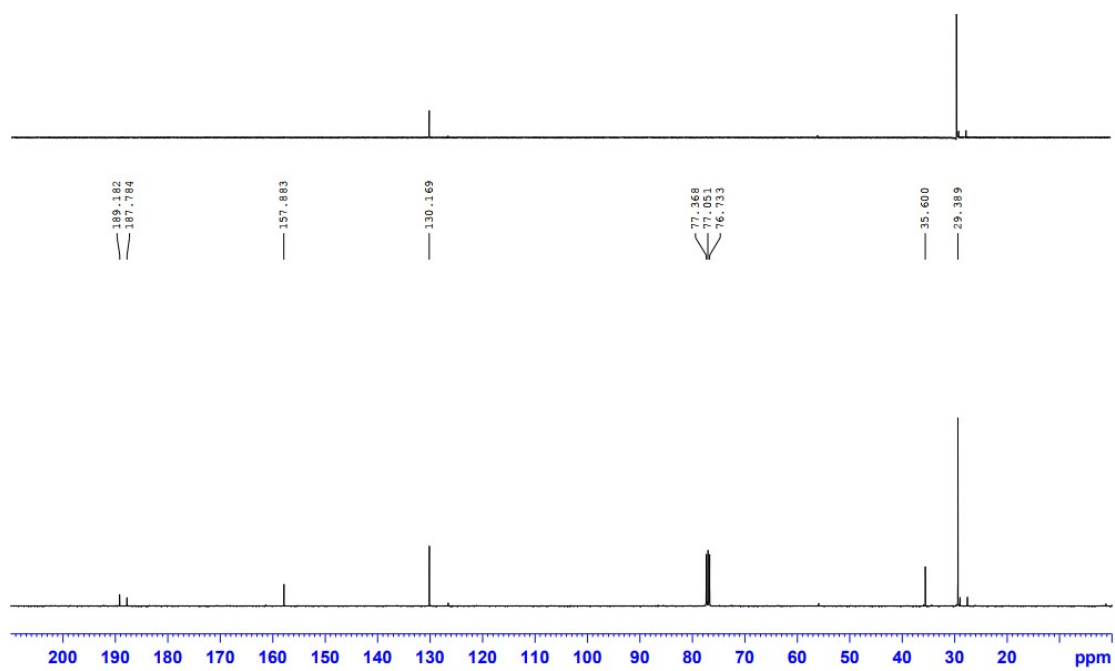

**Fig. S7.** <sup>13</sup>C NMR (100MHz, CDCl<sub>3</sub>) spectra of compound **4**

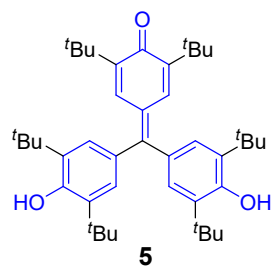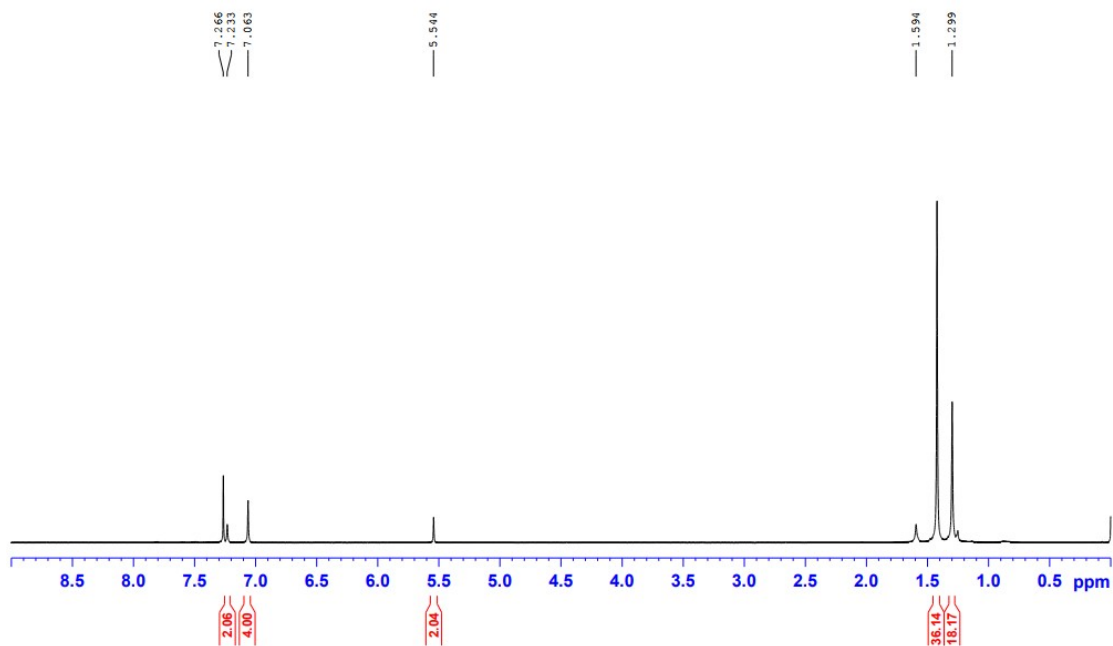

**Fig. S8.**  $^1\text{H}$  NMR (400MHz,  $\text{CDCl}_3$ ) spectra of compound **5**

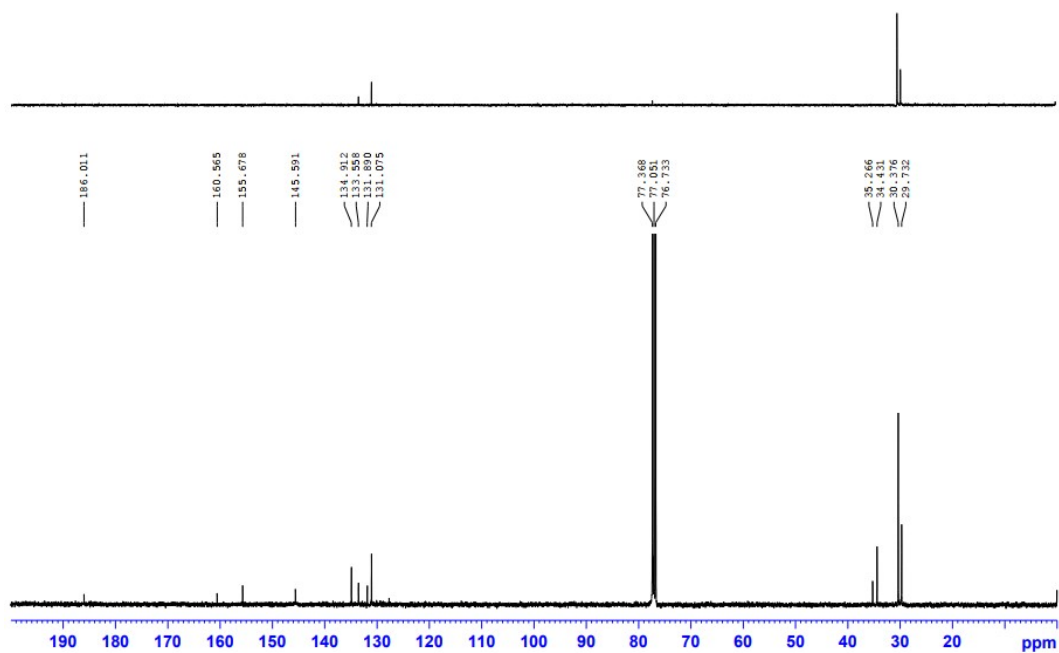

**Fig. S9.**  $^{13}\text{C}$  NMR (100MHz,  $\text{CDCl}_3$ ) spectra of compound **5**



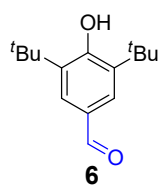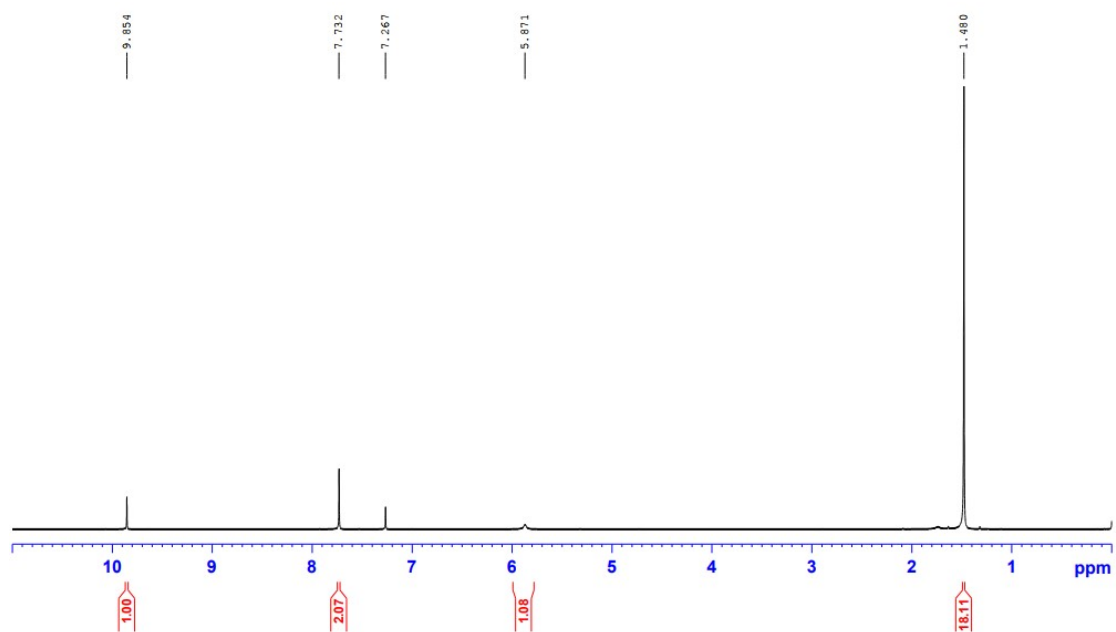

Fig. S10. <sup>1</sup>H NMR (400MHz, CDCl<sub>3</sub>) spectra of compound 6

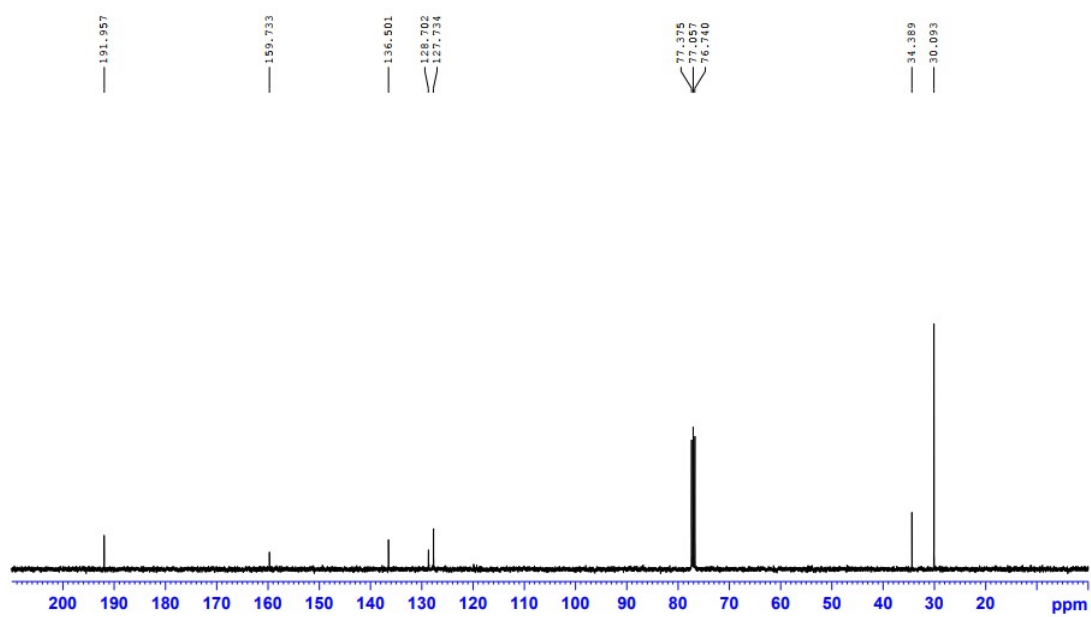

Fig. S11. <sup>13</sup>C NMR (100MHz, CDCl<sub>3</sub>) spectra of compound 6
